# Supplementary material
Source: MDPI journal article supplement (https://www.mdpi.com/2073-4441/12/11/3126)
Supplement: s1 [file s1]

Archive with 3 entries (3 files):
- Supplementary Informations.pdf
- Supplementary Material A - Model Code.html
- Supplementary Material B - Modeling Input Data.csv
