# Supplementary material
Source: MDPI journal article supplement (https://www.mdpi.com/2073-4441/12/11/3126)
Supplement: s1 [file s1 › Supplementary Informations.pdf]

# Settling of Road-Deposited Sediment: Influence of Particle Density, Shape, Low Temperatures, and De-Icing Salt

Steffen H. Rommel <sup>1</sup>, Laura Gelhardt <sup>2</sup>, Antje Welker <sup>2</sup> and Brigitte Helmreich <sup>1,\*</sup>

<sup>1</sup> Chair of Urban Water Systems Engineering, Technical University of Munich, Am Coulombwall 3, 85748 Garching, Germany; sww@tum.de

<sup>2</sup> Fachgebiet Siedlungswasserwirtschaft und Hydromechanik (Institute of Urban Water Management and Hydromechanics), Frankfurt University of Applied Sciences, Nibelungenplatz 1, 60318 Frankfurt am Main, Germany; antje.welker@fb1.fra-uas.de

\* Correspondence: b.helmreich@tum.de

## Materials and Methods

To assess the comparability of filtration and evaporation to determine the settled mass fraction, 100 mg of MiW4 were added to 10 mL DI water and analyzed.

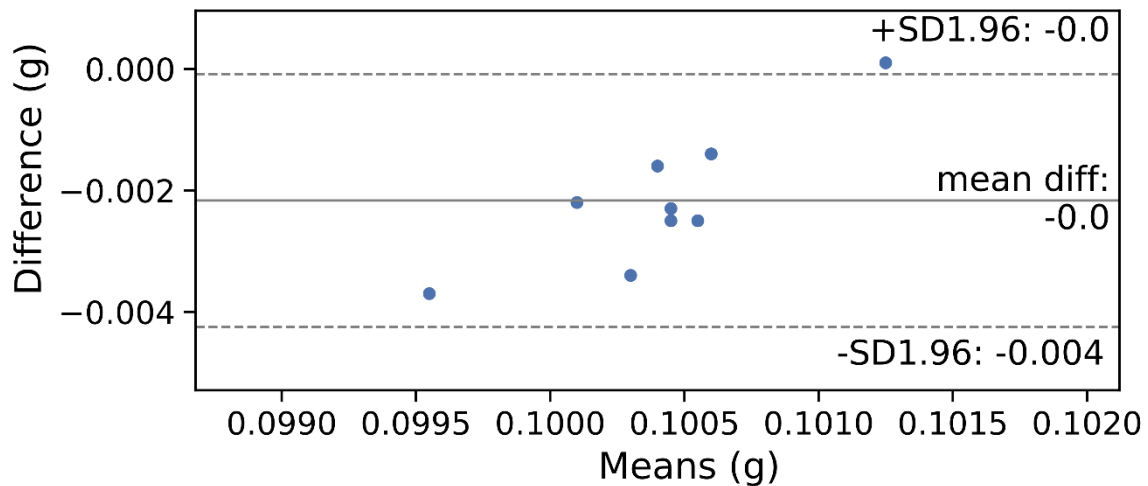

**Figure S1.** Bland-Altman plot for comparison of the two methods for the determination of the settled fraction (evaporation and filtration), the area between the dashed lines indicates the 95% confidence interval,  $n=9$ , one outlier was removed.

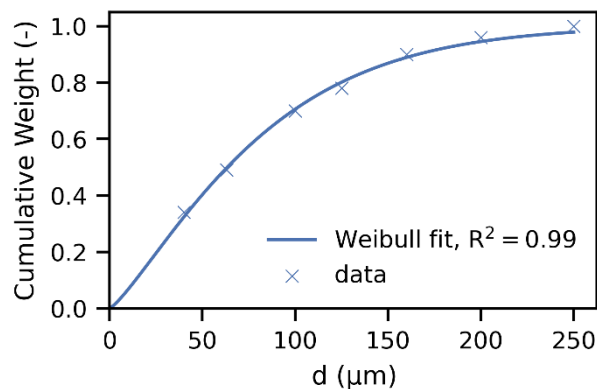

**Figure S2.** Particle size distribution of the pre-processed road-deposited sediments, fitted Weibull distribution for subsequent modeling of the sedimentation processes.

## Results

### Particle size and shape

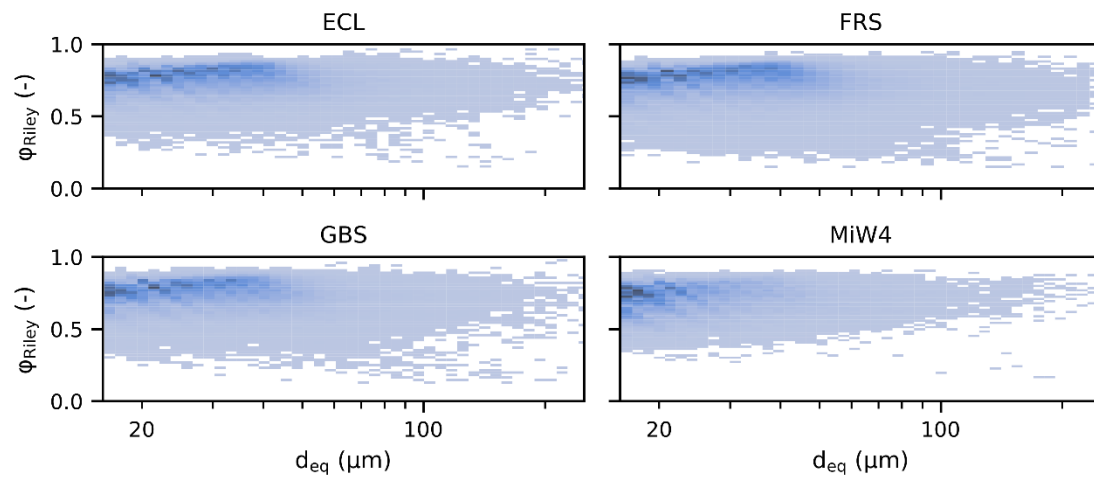

**Figure S3.** 2D histogram of  $\phi_{Riley}$  with respect to  $d_{eq}$  of all analyzed samples, color opacity indicates the density of counts, ECL  $n=130,986$ , FRS  $n=211,209$ , GBS  $n=134,392$ , MiW4  $n=57,973$ .

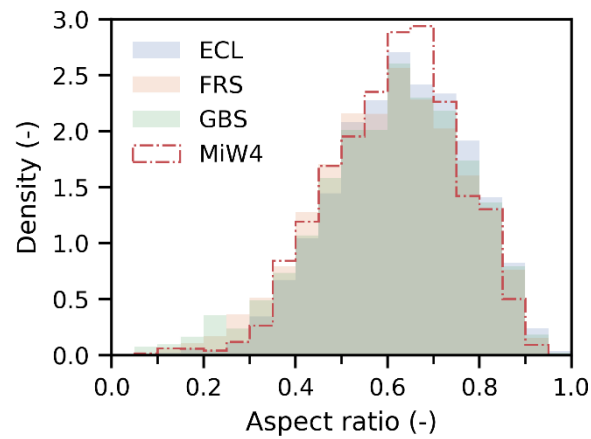

**Figure S4.** Mass fraction weighted histogram of the aspect ratios of the analyzed samples, ECL  $n=130,986$ , FRS  $n=211,209$ , GBS  $n=134,392$ , MiW4  $n=57,973$ .

### Settling experiments

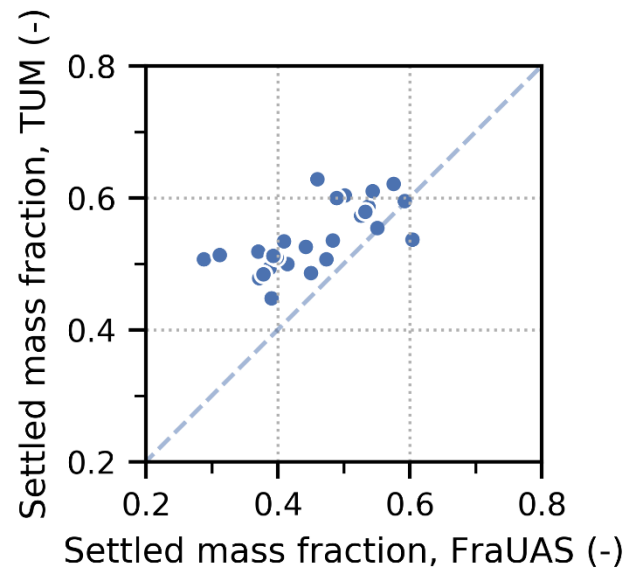

**Figure S5.** Comparison of the experimental results of settling experiments using the method described in this paper conducted by two different executors,  $n=27$ .

### Validation of settling model

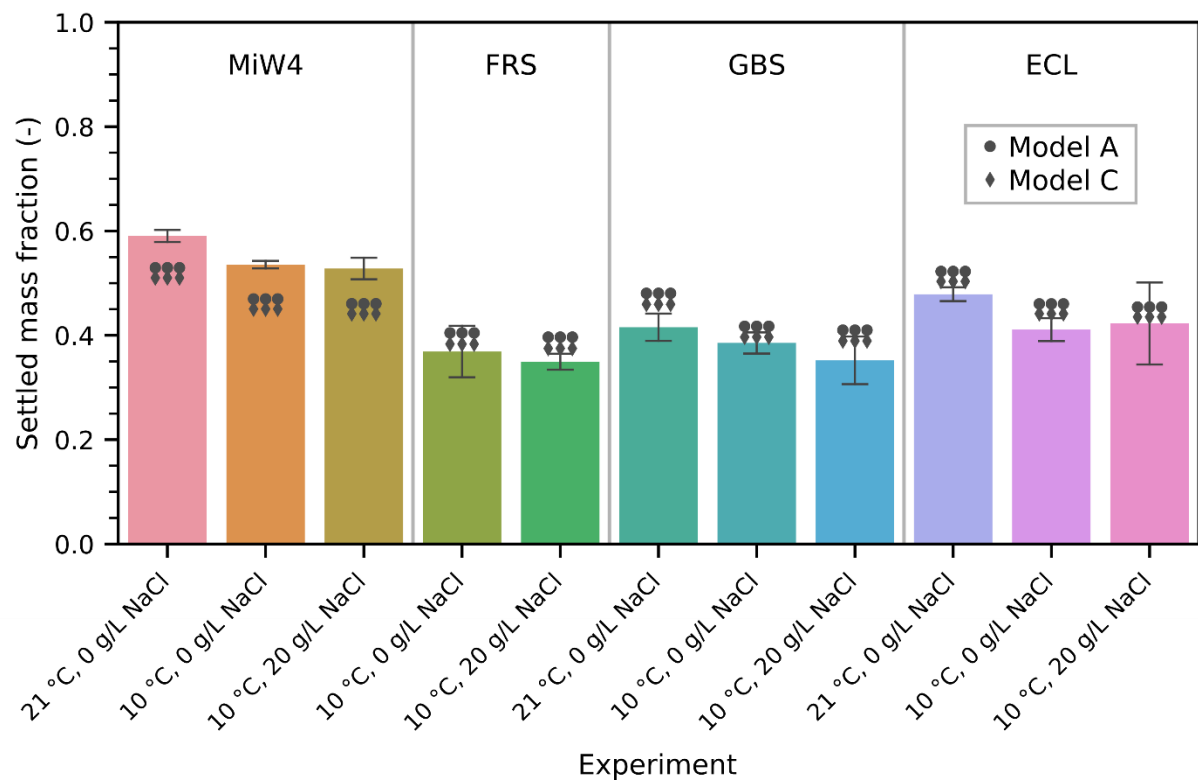

**Figure S6.** Settled mass fraction in the settling experiments with varying temperature (21 and 10 °C) and NaCl concentration (0 and 20 g/L),  $n=3$  for each experiment. The error bars indicate the standard deviation. Experiment FRS, 21 °C, 0g/L was not conducted due to low sample quantity. Marker show the predicted settled mass fraction determined by Model A and C.

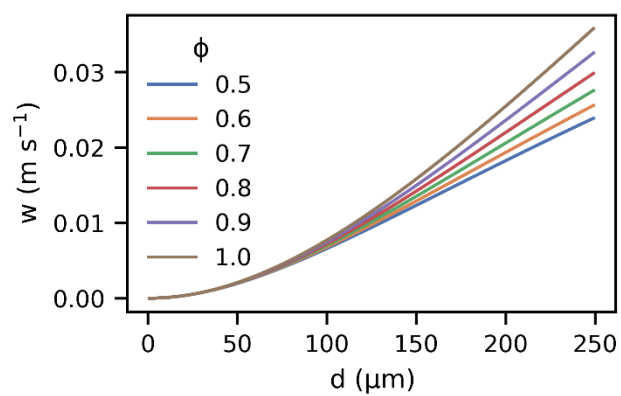

**Figure S7.** Settling velocity determined with the equations proposed by Haider and Levenspiel (model C) with respect to particle diameter and sphericity at 20 °C,  $q_s$  of MiW4, and  $w_{NaCl}=0$ .
