# Supplementary material
Source: MDPI journal article supplement (https://www.mdpi.com/2073-4441/12/11/3126)
Supplement: s1 [file s1 › Supplementary Material B - Modeling Input Data.csv]

experiment	t (°C)	w_nacl (-)	sample volume (mL)	material	rho_s (kg m-3)	LOI (%)	circularity (-)	settled exp (-)	Operator
MiW4, 21 °C, 0 g/L	21.1	0.0	12.22	Millisil W4	2650	0.1	0.733	0.5922920892494928	FraUAS
MiW4, 21 °C, 0 g/L	21.1	0.0	12.95	Millisil W4	2650	0.1	0.733	0.6036217303822937	FraUAS
MiW4, 21 °C, 0 g/L	21.1	0.0	13.13	Millisil W4	2650	0.1	0.733	0.5754527162977866	FraUAS
MiW4, 10 °C, 0 g/L	10.5	0.0	11.98	Millisil W4	2650	0.1	0.733	0.5372233400402414	FraUAS
MiW4, 10 °C, 0 g/L	10.5	0.0	11.3	Millisil W4	2650	0.1	0.733	0.5260869565217392	FraUAS
MiW4, 10 °C, 0 g/L	10.5	0.0	10.9	Millisil W4	2650	0.1	0.733	0.5432595573440644	FraUAS
MiW4, 10 °C, 20 g/L	10.2	0.02		Millisil W4	2650	0.1	0.733	0.5508130081300814	FraUAS
MiW4, 10 °C, 20 g/L	10.2	0.02		Millisil W4	2650	0.1	0.733	0.5010183299389002	FraUAS
MiW4, 10 °C, 20 g/L	10.2	0.02		Millisil W4	2650	0.1	0.733	0.532258064516129	FraUAS
FRS, 10 °C, 0 g/L	10.2	0.0	15.58	FRS.Q3.17	2250	22.0	0.717	0.3924843423799583	FraUAS
FRS, 10 °C, 0 g/L	10.2	0.0	10.28	FRS.Q3.17	2250	22.0	0.717	0.41372141372141374	FraUAS
FRS, 10 °C, 0 g/L	10.2	0.0	15.6	FRS.Q3.17	2250	22.0	0.717	0.3002070393374741	FraUAS
FRS, 10 °C, 20 g/L	10.2	0.02		FRS.Q3.17	2250	22.0	0.717	0.3581780538302277	FraUAS
FRS, 10 °C, 20 g/L	10.2	0.02		FRS.Q3.17	2250	22.0	0.717	0.32776617954070986	FraUAS
FRS, 10 °C, 20 g/L	10.2	0.02		FRS.Q3.17	2250	22.0	0.717	0.3619246861924686	FraUAS
GBS, 21 °C, 0 g/L	21.0	0.0	7.97	GBS.Q1.17	2320	18.0	0.732	0.45020746887966806	FraUAS
GBS, 21 °C, 0 g/L	21.0	0.0	14.29	GBS.Q1.17	2320	18.0	0.732	0.38716356107660455	FraUAS
GBS, 21 °C, 0 g/L	21.0	0.0	17.52	GBS.Q1.17	2320	18.0	0.732	0.4092827004219409	FraUAS
GBS, 10 °C, 0 g/L	10.2	0.0	11.42	GBS.Q1.17	2320	18.0	0.732	0.4140786749482402	FraUAS
GBS, 10 °C, 0 g/L	10.2	0.0	18.11	GBS.Q1.17	2320	18.0	0.732	0.37037037037037035	FraUAS
GBS, 10 °C, 0 g/L	10.2	0.0	16.7	GBS.Q1.17	2320	18.0	0.732	0.37166324435318276	FraUAS
GBS, 10 °C, 20 g/L	10.3	0.02		GBS.Q1.17	2320	18.0	0.732	0.39039665970772447	FraUAS
GBS, 10 °C, 20 g/L	10.3	0.02		GBS.Q1.17	2320	18.0	0.732	0.37815126050420167	FraUAS
GBS, 10 °C, 20 g/L	10.3	0.02		GBS.Q1.17	2320	18.0	0.732	0.28781512605042014	FraUAS
ECL, 21 °C, 0 g/L	21.0	0.0	12.89	ECL.Q2.17	2600	8.0	0.744	0.4877551020408163	FraUAS
ECL, 21 °C, 0 g/L	21.0	0.0	15.0	ECL.Q2.17	2600	8.0	0.744	0.45995893223819306	FraUAS
ECL, 21 °C, 0 g/L	21.0	0.0	11.89	ECL.Q2.17	2600	8.0	0.744	0.4887525562372188	FraUAS
ECL, 10 °C, 0 g/L	10.1	0.0	11.68	ECL.Q2.17	2600	8.0	0.744	0.3979591836734694	FraUAS
ECL, 10 °C, 0 g/L	10.1	0.0	12.94	ECL.Q2.17	2600	8.0	0.744	0.3930753564154786	FraUAS
ECL, 10 °C, 0 g/L	10.1	0.0	13.65	ECL.Q2.17	2600	8.0	0.744	0.44195519348268836	FraUAS
ECL, 10 °C, 20 g/L	10.3	0.02	7.3	ECL.Q2.17	2600	8.0	0.744	0.4827586206896552	FraUAS
ECL, 10 °C, 20 g/L	10.3	0.02	6.9	ECL.Q2.17	2600	8.0	0.744	0.4735772357723578	FraUAS
ECL, 10 °C, 20 g/L	10.3	0.02	11.9	ECL.Q2.17	2600	8.0	0.744	0.31171548117154807	FraUAS
